# Supplementary material for: A NiCo/NiO–CoOx ultrathin layered catalyst with strong basic sites for high-performance H2 generation from hydrous hydrazine
Source: Royal Society of Chemistry journal article supplement (doi:10.1039/c6ta01092j), 2016-01-01
Supplement: c6ta01092j1.pdf [file c6ta01092j1.pdf]

## Electronic Supporting Information

### **NiCo/NiO-CoO<sub>x</sub> Ultrathin Layered Catalyst with Strong Basic Sites for High-Performance H<sub>2</sub> Generation from Hydrous Hydrazine**

Dandan Wu <sup>a</sup>, Ming Wen<sup>\*a,b</sup>, Xijian Lin<sup>a</sup>, Qingsheng Wu<sup>a</sup>, Chen Gu<sup>a</sup> and Hanxing Chen<sup>a</sup>

<sup>a</sup>Department of Chemistry, Shanghai Key Laboratory of Chemical Assessment and Sustainability, Tongji University, 1239 Siping Road, Shanghai 200092, R. P. China.

<sup>b</sup>Shanghai Key Laboratory of D&A for Metal-Functional Materials, Tongji University, 4800 Caoan Road, Shanghai 201804, China.

Corresponding Authors

\*Ming Wen: E-mail: m\_wen@tongji.edu.cn.

## **The Supplement of Experimental Section**

### **1. Chemicals**

All chemicals were commercial and used without further purification. Nickel chloride hexahydrate ( $\text{NiCl}_2 \cdot 6\text{H}_2\text{O}$ , Sinopharm Chemical Reagent Co., Ltd.,  $\geq 98\%$ ), cobalt chloride hexahydrate ( $\text{CoCl}_2 \cdot 6\text{H}_2\text{O}$ , Aladdin Chemistry Co., Ltd,  $\geq 99.7\%$ ), hydrazine monohydrate ( $\text{N}_2\text{H}_4 \cdot \text{H}_2\text{O}$ , Aladdin Chemistry Co., Ltd, 98%), potassium borohydride ( $\text{KBH}_4$ , shanghai Mackin Biochemical Co., Ltd., 97%), sodium carbonate ( $\text{Na}_2\text{CO}_3$ , Sinopharm Chemical Reagent Co., Ltd.,  $\geq 99.8\%$ ), ethanol absolute ( $\text{C}_2\text{H}_5\text{OH}$ , Sinopharm Chemical Reagent Co., Ltd.,  $\geq 99.7\%$ ), hydrochloric acid ( $\text{HCl}$ , Sinopharm Chemical Reagent Co., Ltd., 37%),  $\gamma$  Aluminium oxide ( $\gamma$ - $\text{Al}_2\text{O}_3$ , Aladdin Chemistry Co., Ltd, 99.99%), Collodion were purchased from Shanghai Ling feng Chemical Reagent Co. Ltd..

### **2. Synthesis of NiCo/NiO-CoO<sub>x</sub> catalysts with different of NiCo content**

In a typically method, When the morphology is urchin-like spheres and nanosheets, we can obtain the composite catalysts with different content of NiCo by changing the incomplete precipitate time (10 min, 15 min, 20 min and 25 min is named as S-a, S-b, S-c and S-d, respectively), or by changing the volume of injected  $\text{Na}_2\text{CO}_3$  when the morphology is NPs.

### **3. Synthesis of NiO-CoO<sub>x</sub> catalysts**

Following the analogous synthetic process of  $\text{Ni}_{70}\text{Co}_{30}/\text{NiO-CoO}_x$  nanosheets, urchin-like spheres and NPs catalysts but without the reduction step and let them precipitate completely, then calcine in argon at 400 °C for 1 h with a heating rate of 1 °C  $\text{min}^{-1}$  can obtain NiO-CoO<sub>x</sub> with corresponding morphology.

### **4. Synthesis of Ni<sub>70</sub>Co<sub>30</sub> NPs**

An aqueous solution of potassium borohydride (25 mL, 25 mM) was added into 100mL solution of a  $\text{NiCl}_2$  (25 mM) and  $\text{CoCl}_2$  (25 mM) mixture in a molar ratio of 7:3 under magnetic stirring within 20 min at 0 °C. The final precipitate was filtered, washed thoroughly with deionized water and dried at 60 °C for 24 h. Then the as-

obtained precipitate was calcined in argon at 400 °C for 1 h with a heating rate of 1 °C min<sup>-1</sup> to get Ni<sub>70</sub>Co<sub>30</sub> NPs.

### **5. Synthesis of Ni<sub>70</sub>Co<sub>30</sub>/Al<sub>2</sub>O<sub>3</sub> catalyst.**

3 g  $\gamma$ -Al<sub>2</sub>O<sub>3</sub> were dissolved in 100 mL solution of NiCl<sub>2</sub> (25 mM) and CoCl<sub>2</sub> (25 mM) mixture in a molar ratio of 7:3 by magnetic stirring, to which an aqueous solution of potassium borohydride (25 mL, 25 mM) was added within 20 min at 0 °C. The final precipitate was filtered, washed thoroughly with deionized water and dried at 60 °C for 24 h. Then the as-obtained precipitate was calcined in argon at 400 °C for 1h with a heating rate of 1 °C min<sup>-1</sup> to get Ni<sub>70</sub>Co<sub>30</sub>/Al<sub>2</sub>O<sub>3</sub> catalysts.

### **6. CO<sub>2</sub> TPD Experiment**

CO<sub>2</sub> temperature-programmed desorption (TPD) was carried out as follows. First, the air on the sample surface was removed under an argon stream (purity of 99.999%) at 573 K for 1 h and the surface was cooled to room temperature in the same argon stream. Then, CO<sub>2</sub> was preadsorbed by the catalyst at 323 K for 2 h. The CO<sub>2</sub> stream was then replaced with the carrier gas, which was kept at 323 K for 2h to purge the gas and physically absorbed CO<sub>2</sub> away from the catalyst surface. After the surface was cooled down to room temperature, CO<sub>2</sub> desorption was carried out by raising the temperature at a speed of 10 K min<sup>-1</sup> up to 1073 K, and the released CO<sub>2</sub> was determined by an on-line gas chromatograph equipped with a thermal conductivity detector.

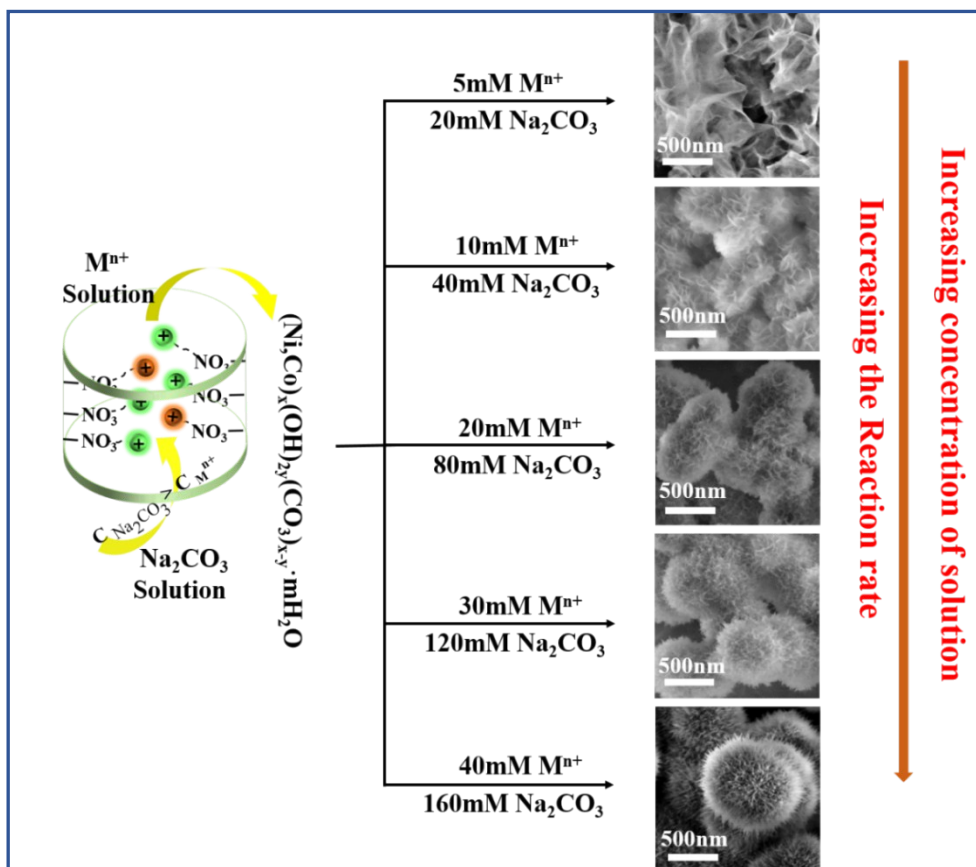

**Figure S1.** Scheme of the effect of the solution concentration on the synthesis of subcarbonate precursor

As show in Figure S1, the influence of reaction system concentration on the morphology of  $(\text{Ni,Co})_x(\text{OH})_{2y}(\text{CO}_3)_{x-y} \cdot m\text{H}_2\text{O}$  has been studied in detail. The increase of solution concentration raises the reaction velocity in the dynamic controlling process, and thereby the morphology gradually changes from nanosheet to urchin-like sphere.

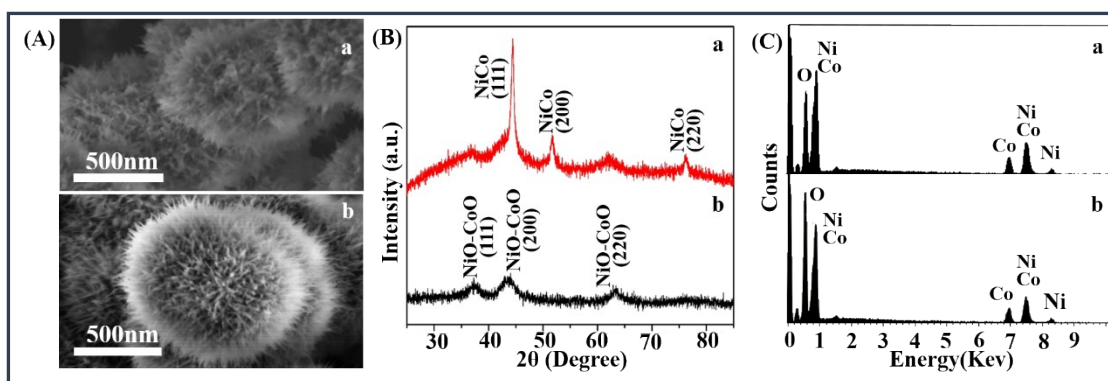

**Figure S2.** SEM images (A), XRD patterns (B) and EDS analysis (C) of urchin-like NiCo/NiO-CoO<sub>x</sub> (a) and NiO-CoO<sub>x</sub> (b).

Figure S2 shows the morphology characterization and structure analysis of urchin-like NiO-CoO<sub>x</sub> and NiCo/NiO-CoO<sub>x</sub>. It can be observed that NiCo NPs are all uniformly anchored on the surface of urchin-like NiO-CoO<sub>x</sub> spheres in SEM images (Figure S2A). The XRD pattern of NiO-CoO<sub>x</sub> (Figure S2 Bb) shows three broad peaks, and all the diffraction peaks (37.0° (111), 42.9° (200) and 62.0° (220)) between the cubic NiO phase (space group: Fm-3m; JCPDS#65-2901) and the cubic CoO phase (space group: Fm-3m; JCPDS#65-2902). The pattern of NiCo/NiO-CoO<sub>x</sub> nanocomposite (Figure S2 Ba) has three sharp peaks at 44.3° (111), at 51.6° (200) and at 76.0° (220) besides the peaks of NiO-CoO<sub>x</sub>, which indicates the formation of NiCo solid solution and agrees well with the face-centered cubic (fcc) lattice of Ni (JCPDF#65-0380) and Co (JCPDF#15-0806), further confirming the fabrication of heterostructured NiCo/NiO-CoO<sub>x</sub> nanocomposites. The EDS analysis performed separately on urchin-like spheres of NiCo/NiO-CoO<sub>x</sub> (Figure S2 Ca) and NiO-CoO<sub>x</sub> (Figure S2 Cb) prove that both of them contain Ni, Co, and O. The atomic ratio of Ni:O and Co:O increase a little after anchoring NiCo on the surface of NiO-CoO<sub>x</sub>, again certifying the formation of NiCo/NiO-CoO<sub>x</sub> composite. Thus the present coprecipitation-reduction method is highly effective to obtain the heterostructured urchin-like NiCo/NiO-CoO<sub>x</sub> nanocomposites with NiCo NPs uniformly loaded on the surface of urchin-like NiO-CoO<sub>x</sub> spheres.

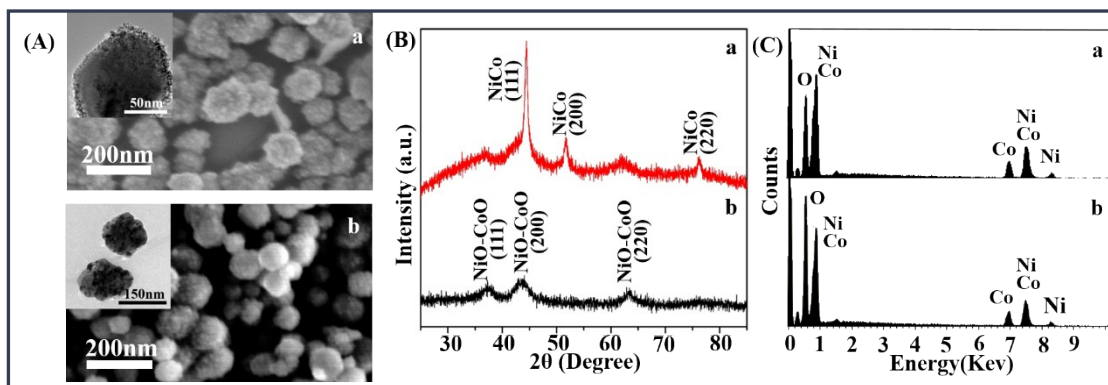

**Figure S3.** SEM images (A) with inset of TEM images, XRD patterns (B) and EDS analysis (C) of NiCo/NiO-CoO<sub>x</sub> NPs(a) and NiO-CoO<sub>x</sub> NPs(b).

The morphology characterization and structure analysis of NiO-CoO<sub>x</sub> NPs and NiCo/NiO-CoO<sub>x</sub> NPs are given in Figure S3. It can be observed that NiCo NPs are all uniformly anchored on the surface of NiO-CoO<sub>x</sub> NPs (Figure S3A). The XRD pattern of NiO-CoO<sub>x</sub> (Figure S3 Bb) shows three broad peaks, and all the diffraction peaks (37.0° (111), 42.9° (200) and 62.0° (220)) between the cubic NiO phase (space group: Fm-3m; JCPDS#65-2901) and the cubic CoO phase (space group: Fm-3m; JCPDS#65-2902). The pattern of NiCo/NiO-CoO<sub>x</sub> nanocomposite (Figure S3 Ba) has three sharp peaks at 44.3° (111), at 51.6° (200) and at 76.0° (220) besides the peaks of NiO-CoO<sub>x</sub>, which indicates the formation of NiCo solid solution and agrees well with the fcc lattice of Ni (JCPDF#65-0380) and Co (JCPDF#15-0806), further confirming the fabrication of heterostructured NiCo/NiO-CoO<sub>x</sub> nanocomposites. The EDS analysis performed separately on NiCo/NiO-CoO<sub>x</sub> NPs (Figure S3 Ca) and NiO-CoO<sub>x</sub> NPs (Figure S3 Cb) prove that both of them contain Ni, Co, and O. And the atomic ratio of Ni:O and Co:O increase a little after anchoring NiCo on the surface of NiO-CoO<sub>x</sub> NPs, again certifying the formation of NiCo/NiO-CoO<sub>x</sub> composite. Thus the present DCCR method is highly effective to obtain the heterostructured NiCo/NiO-CoO<sub>x</sub> nanocomposites with NiCo NPs uniformly loaded on the surface of NiO-CoO<sub>x</sub> NPs.

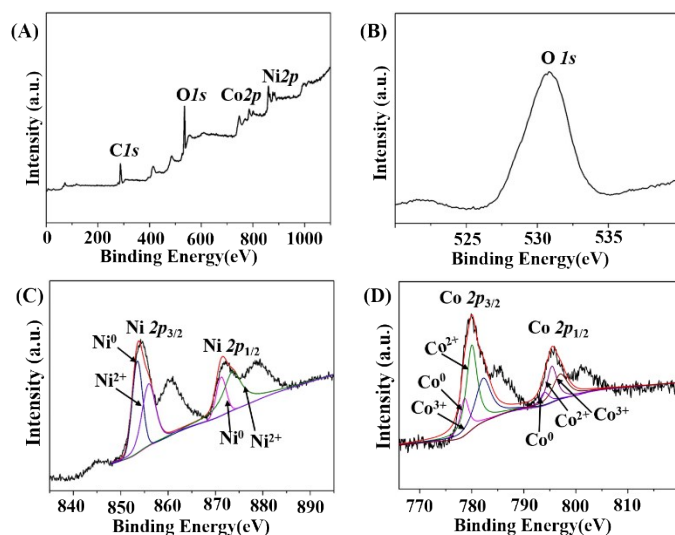

**Figure S4.** (A) XPS analysis of urchin-like NiCo/NiO-CoO<sub>x</sub> and detailed analysis of O 1s (B), Ni 2p(C) and Co 2p (D) from urchin-like NiCo/NiO-CoO<sub>x</sub>.

XPS was measured to explore the surface element valance information of urchin-like NiCo/NiO-CoO<sub>x</sub>. In Figure S4, the numbers of emitted photoelectrons are given as a function of binding energy up to 1100 eV. Four photoemission peaks (Ni 2p, Co 2p, O 1s and C 1s) appear in the wide spectra of the urchin-like NiCo/NiO-CoO<sub>x</sub> (Figure S4A). The detailed spectrum of Ni 2p peaks magnified from the wide spectrum of the urchin-like NiCo/NiO-CoO<sub>x</sub> shows two peaks at 854.2 eV and 871.5 eV due to the spin-orbit splitting of 2p<sub>3/2</sub> and 2p<sub>1/2</sub>, respectively, and two satellite peaks at 860.8 and 880.1 eV are two shakeup type peaks of nickel at the high binding energy side of Ni 2p<sub>3/2</sub> and Ni 2p<sub>1/2</sub>. In order to clarify the exact bonding form of Ni, the narrow Ni spectrum was analyzed by using XPSPEAK41 software. As shown in Figure S4C the peak of Ni 2p<sub>3/2</sub> and Ni 2p<sub>1/2</sub> both can be split to two peaks with BE values of 853.5 eV & 855.9 eV and 871.2 eV & 873.6 eV, attributed to Ni (0) and Ni (II). The detailed spectrum of Co 2p peaks in Figure S4D are analogous to Ni 2p peaks, and the peaks of Co 2p<sub>3/2</sub> and Co 2p<sub>1/2</sub> both can be split to three peaks with BE values of 778.2, 780, 782.9 eV, and 794.1, 795.4, 798 eV, respectively, correspond to Co (0) , Co (II) and Co (III). As a trace of Co (II) in the catalyst surface can be oxidized to Co (III) in the process of sample storage and characterization, Co (III) can be observed. Furthermore, in Figure S4B the O 1s peak at 530.5 eV indicates the presence of the O species existing in the Ni-O bonds in NiO and Co-O bonds in CoO<sub>x</sub> (Figure S4B).

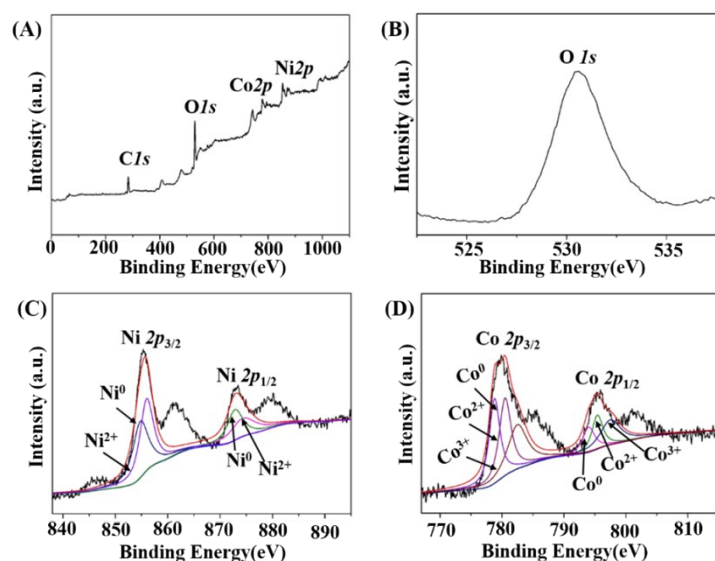

**Figure S5.** (A) XPS analysis of NiCo/NiO-CoO<sub>x</sub> NPs and detailed analysis of O 1s (B), Ni 2p(C) and Co 2p(D) from NiCo/NiO-CoO<sub>x</sub> NPs.

Figure S5 shows the XPS analysis of NiCo/NiO-CoO<sub>x</sub> NPs, in which the numbers of emitted photoelectrons are given as a function of binding energy up to 1100 eV. Four photoemission peaks (Ni 2p, Co 2p, O 1s and C 1s) appear in the wide spectra of the NiCo/NiO-CoO<sub>x</sub> NPs (Figure S5A). The detailed spectrum of Ni 2p peaks magnified from the wide spectrum of the NiCo/NiO-CoO<sub>x</sub> NPs shows two peaks at 854.8 eV and 872.1 eV due to the spin-orbit splitting of 2p<sub>3/2</sub> and 2p<sub>1/2</sub>, respectively, and two satellite peaks at 861 and 880.6 eV are two shakeup type peaks of nickel at the high binding energy side of Ni 2p<sub>3/2</sub> and Ni 2p<sub>1/2</sub>. And the narrow Ni spectrum was further analyzed by using XPSPEAK41 software to clarify the exact bonding form of Ni. As shown in Figure S5C the peak of Ni 2p<sub>3/2</sub> and Ni 2p<sub>1/2</sub> both can be split to two peaks with BE values of 854.5 eV & 856 eV and 872.8 eV & 874.3 eV, attributed to Ni (0) and Ni (II). The detailed spectrum of Co 2p peaks in Figure S5D are analogous to Ni 2p peaks, and the peaks of Co 2p<sub>3/2</sub> and Co 2p<sub>1/2</sub> both can be split to three peaks with BE values of 778.8, 780.5, 782.5 eV, and 794, 795.4, 797.5 eV, respectively, correspond to Co (0), Co (II) and Co (III). As a trace of Co (II) in the catalyst surface can be oxidized to Co (III) in the process of sample storage and characterization, Co (III) can be observed. Moreover, the O 1s peak at 530.3 eV indicates the presence of the O species existing in the Ni-O bonds in NiO and Co-O bonds in CoO<sub>x</sub> (Figure S5B).



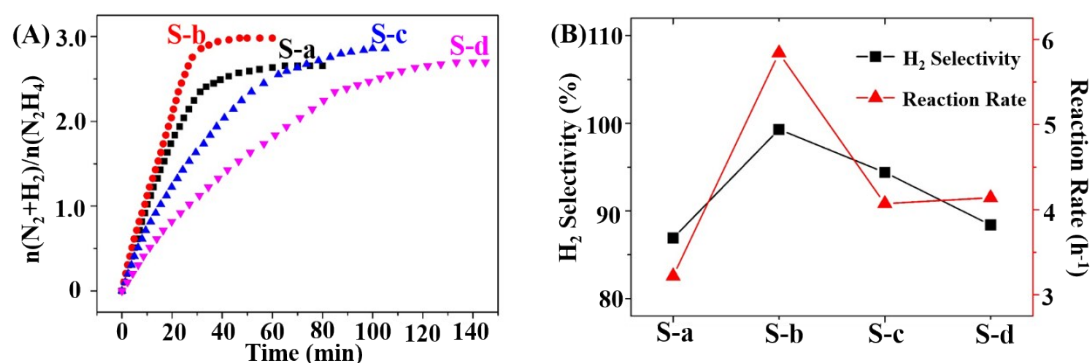

**Figure S6.** (A)  $n(\text{N}_2+\text{H}_2)/n(\text{N}_2\text{H}_4)$  versus time for  $\text{Ni}_{70}\text{Co}_{30}/\text{NiO-CoO}_x$  layered nanosheets with different NiCo content prepared by different incomplete precipitation time: 10min(S-a), 15min(S-b), 20min(S-c) and 25min(S-d); (B) The variations of H<sub>2</sub> selectivity and reaction rate for  $\text{Ni}_{70}\text{Co}_{30}/\text{NiO-CoO}_x$  layered nanosheets with different NiCo content. (alloy/ $\text{N}_2\text{H}_4=1:5$ , at 25°C)

Figure S6A shows catalytic performance of  $\text{NiCo}/\text{NiO-CoO}_x$  layered nanosheets with different NiCo content prepared by different incomplete precipitation time, it can be clearly observed that when the incomplete precipitate time is 15min(S-b), the as-attained catalysts present the best catalytic performance. And the variations of H<sub>2</sub> selectivity and reaction rate for these samples are illustrated in Figure S6B, in which S-b has the highest H<sub>2</sub> selectivity and reaction rate than others. Thus the catalyst of  $\text{NiCo}/\text{NiO-CoO}_x$  layered nanosheets obtained by the incomplete precipitate time of 15min, could harvest the best catalytic activity and selectivity performance.

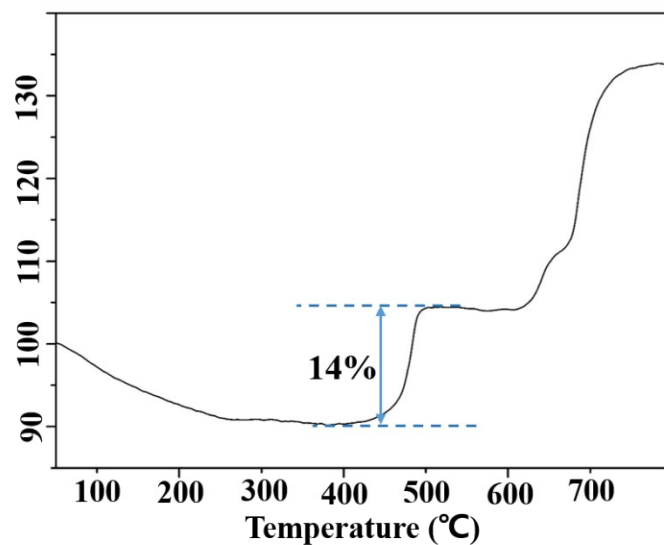

**Figure S7.** TG analysis for the NiCo/NiO-CoO<sub>x</sub> layered nanosheets obtained by the incomplete precipitate time of 15min;

As shown in Figure S7 the TG analysis operated in the air, it can be clearly observed that the weight loss between 50 °C and 200 °C, which could be ascribed to the release of physically adsorbed water. Also, there was a dramatic mass increase of 14% at the temperature range between 200 °C and 500 °C, which corresponded to the NiCo-alloy combined with one oxygen atom. After calculation, it can be obtained that the content of NiCo-alloy is 51.6%. Additionally the mass increase after 600 °C is attributed to NiO and CoO respectively oxidized to Ni<sub>2</sub>O<sub>3</sub> and Co<sub>2</sub>O<sub>3</sub>.

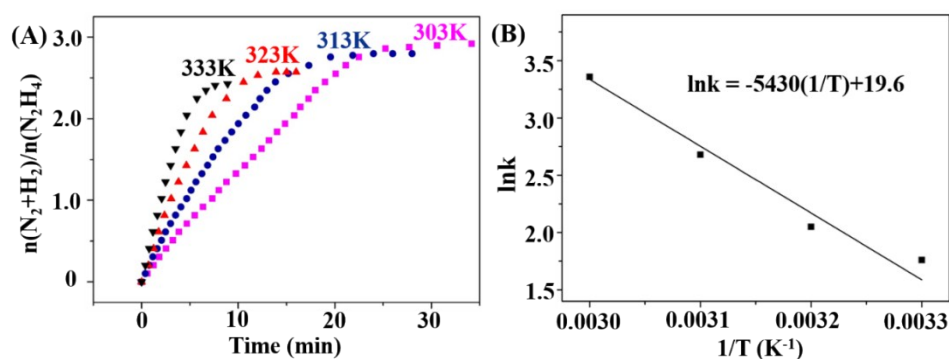

**Figure S8.** (A)  $n(\text{N}_2+\text{H}_2)/n(\text{N}_2\text{H}_4)$  versus time for  $\text{Ni}_{70}\text{Co}_{30}/\text{NiO-CoO}_x$  layered nanosheets at temperatures ranging from 303K, 313K, 323K and 333K. (B) Arrhenius plots for the decomposition of hydrazine catalyzed by  $\text{Ni}_{70}\text{Co}_{30}/\text{NiO-CoO}_x$  layered nanosheets at different reaction temperatures. (alloy/ $\text{N}_2\text{H}_4=1:5$ )

In order to obtain the activation energy ( $E_a$ ) of the  $\text{H}_2$  generation from  $\text{N}_2\text{H}_4 \cdot \text{H}_2\text{O}$  catalyzed by  $\text{Ni}_{70}\text{Co}_{30}/\text{NiO-CoO}_x$  layered nanosheets, the catalytic reactions were carried out at temperatures ranging from 303 to 333K as show in Figure S8A. It clearly shows that the amount of hydrogen generated is linearly dependent on the reaction time at each temperature, which demonstrates that such a decomposition reaction is of zero order. In a zero-order reaction, the Arrhenius equation can be applied to calculate the  $E_a$  of the  $\text{H}_2$  generation from  $\text{N}_2\text{H}_4 \cdot \text{H}_2\text{O}$  catalyzed by the as-synthesized  $\text{Ni}_{70}\text{Co}_{30}/\text{NiO-CoO}_x$  layered nanosheets. From the Arrhenius plot of  $\ln k$  versus  $1/T$  in Figure S8B, the  $E_a$  is estimated to be  $45.15 \text{ kJ} \cdot \text{mol}^{-1}$ , which is lower than most of catalysts reported previously. Additionally, it can be clearly observed that the hydrogen selectivity decreased when increasing the reaction temperature from 303 K to 333 K in Figure S8A. As the coordinated-unsaturated  $\text{O}^{2-}$  from the ultrathin layered  $\text{NiO-CoO}_x$  support can weaken the strength of N-H bonds through the hydrogen-bond interaction, thus the cleavage of N-N need more energy than N-H. But the energy of the reaction system will increase when the reaction temperature increased, which would increase the possibility of the cleavage of N-N, thereby decreased the hydrogen selectivity.

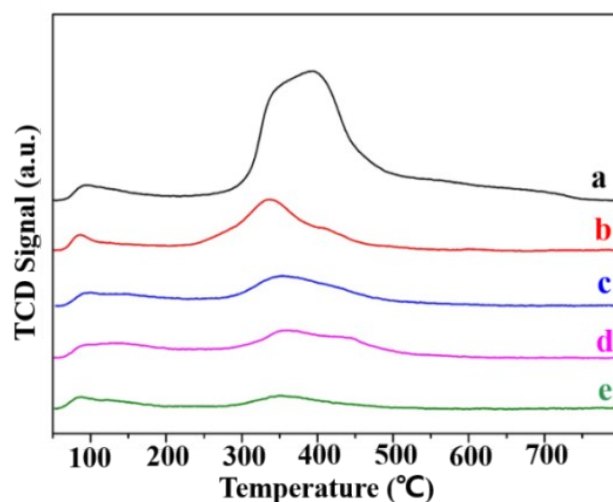

**Figure S9.** CO<sub>2</sub> TPD profiles of: NiCo/NiO-CoO<sub>x</sub> layered nanosheets (a), NiCo/Al<sub>2</sub>O<sub>3</sub> (b), urchin-like NiCo/NiO-CoO<sub>x</sub> (c), NiCo/NiO-CoO<sub>x</sub> NPs (d) and NiCo NPs (e).

A quantitative measure of the number and strength of basic sites was obtained by the CO<sub>2</sub>-TPD experiment in Figure S9, it shows that all the samples (curves a–e) can be deconvoluted in two desorption peaks. The peak centered at low temperature (50–120 °C) is generally attributed to the surface hydroxyl groups (weak Brønsted base site); the peak centered at high temperature (300–500 °C) corresponds to the O<sup>2-</sup> ion with low coordination derived from the surface defects of NiO-CoO<sub>x</sub>. Meanwhile, the corresponding value by integral computation of basic strength showed in Table 1, the strength of basic sites on Ni<sub>70</sub>Co<sub>30</sub>/NiO-CoO<sub>x</sub> layered nanosheets was clearly larger than other samples including NiCo/Al<sub>2</sub>O<sub>3</sub>, urchin-like NiCo/NiO-CoO<sub>x</sub>, NiCo/NiO-CoO<sub>x</sub> NPs and NiCo NPs, meanwhile the corresponding reaction activity and selectivity were also better than others (Table 1).

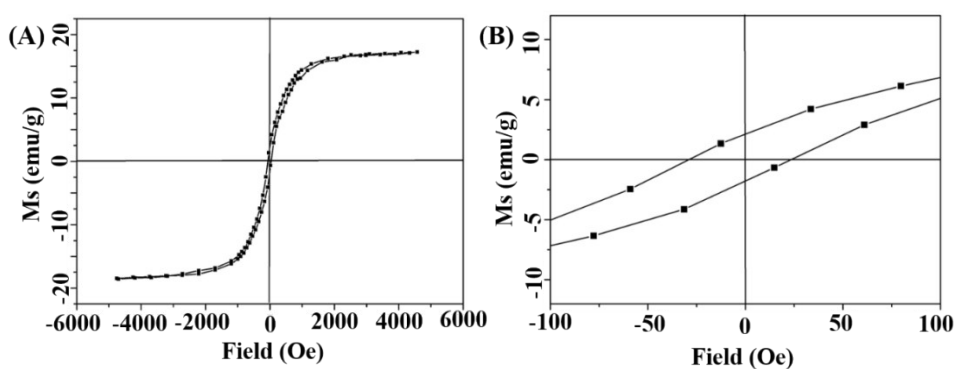

**Figure S10.** (A) Room-temperature magnetic hysteresis loops of NiCo/NiO-CoO<sub>x</sub> layered nanosheets; (B) magnification part hysteresis loops of NiCo/NiO-CoO<sub>x</sub> layered nanosheets.

The magnetic hysteresis loop is plotted in Figure S10. As shown in Figure S10A the magnetization saturation ( $M_s$ ) value is 17.57 emu/g. Although the value is lower than some common magnetic materials, it does not affect the magnetic-recyclability of the products. In our case, the as-prepared NiCo/NiO-CoO<sub>x</sub> layered nanosheets suspended in the aqueous solution can quickly respond to a magnet, thus can be easily separated and recovered by an external magnet (Figure 4D inset), and then can be readily redispersed in water by stirring or sonication due to its low coercivity ( $H_c$ ) (25.17 Oe) and retentivity ( $M_r$ ) (2.0 emu/g) (Figure S10B), indicating the excellent ability of magnetic separation of NiCo/NiO-CoO<sub>x</sub> layered nanosheets.

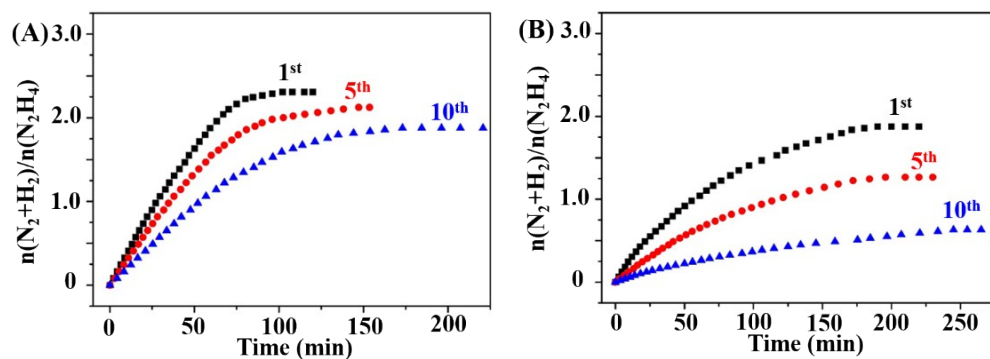

**Figure S11.** Recyclability tests of  $\text{Ni}_{70}\text{Co}_{30}/\text{NiO-CoO}_x$  nanocomposite for urchin-like spheres (A) and NPs (B). (alloy/ $\text{N}_2\text{H}_4=1:5$ , at  $25^\circ\text{C}$ )

Figure S11 illustrates the lifetime of urchin-like  $\text{Ni}_{70}\text{Co}_{30}/\text{NiO-CoO}_x$  (A) and  $\text{Ni}_{70}\text{Co}_{30}/\text{NiO-CoO}_x$  NPs (B), it can be clearly observed that they both have a greater decrease of activity and selectivity toward the  $\text{H}_2$  generation from  $\text{N}_2\text{H}_4 \cdot \text{H}_2\text{O}$  decomposition after 10 cycles than those of  $\text{Ni}_{70}\text{Co}_{30}/\text{NiO-CoO}_x$  layered nanosheets showed in Figure 4D, especially  $\text{Ni}_{70}\text{Co}_{30}/\text{NiO-CoO}_x$  NPs.
